# Supplementary material for: End-of-treatment and serial PET imaging in primary mediastinal B-cell lymphoma following dose-adjusted EPOCH-R: a paradigm shift in clinical decision making
Source: PubMed Central journal article supplement — Haematologica. 2018 May 10;103(8):1337–44. doi: 10.3324/haematol.2018.192492 (PMC6068044; doi:10.3324/haematol.2018.192492), 2018-08
Supplement: 2018.192492.MELANI_SUPPL.pdf [file 2018.192492.MELANI_SUPPL.pdf]

## End-of-treatment and serial PET imaging in primary mediastinal B-cell lymphoma following dose-adjusted EPOCH-R: a paradigm shift in clinical decision making

Christopher Melani,<sup>1</sup> Ranjana Advani,<sup>2</sup> Mark Roschewski,<sup>1</sup> Kelsey M. Walters,<sup>2</sup> Clara C. Chen,<sup>3</sup> Lucia Baratto,<sup>4</sup> Mark A. Ahlman,<sup>3</sup> Milos D. Miljkovic,<sup>1</sup> Seth M. Steinberg,<sup>5</sup> Jessica Lam,<sup>2</sup> Margaret Shovlin,<sup>1</sup> Kieron Dunleavy,<sup>6</sup> Stefania Pittaluga,<sup>7</sup> Elaine S. Jaffe<sup>7</sup> and Wyndham H. Wilson<sup>1</sup>

<sup>1</sup>Lymphoid Malignancies Branch, Center for Cancer Research, National Cancer Institute, National Institutes of Health, Bethesda, MD; <sup>2</sup>Stanford Cancer Institute, Stanford University, CA; <sup>3</sup>Nuclear Medicine Division, Radiology and Imaging Sciences, Clinical Center, National Institutes of Health, Bethesda, MD; <sup>4</sup>Nuclear Medicine and Molecular Imaging Division, Stanford University, CA; <sup>5</sup>Biostatistics and Data Management Section, Center for Cancer Research, National Cancer Institute, National Institutes of Health, Bethesda, MD; <sup>6</sup>George Washington University Cancer Center, DC and <sup>7</sup>Laboratory of Pathology, Clinical Center, National Cancer Institute, National Institutes of Health, Bethesda, MD, USA

*CM and RA contributed equally to this work.*

©2018 Ferrata Storti Foundation. This is an open-access paper. doi:10.3324/haematol.2018.192492

Received: March 5, 2018.

Accepted: May 10, 2018.

Pre-published: May 10, 2018.

Correspondence: wilsonw@mail.nih.gov

---

SUPPLEMENTARY FIGURES

Figure 1A.  $SUV_{max}$  in negative EOT FDG-PET non-progressors.

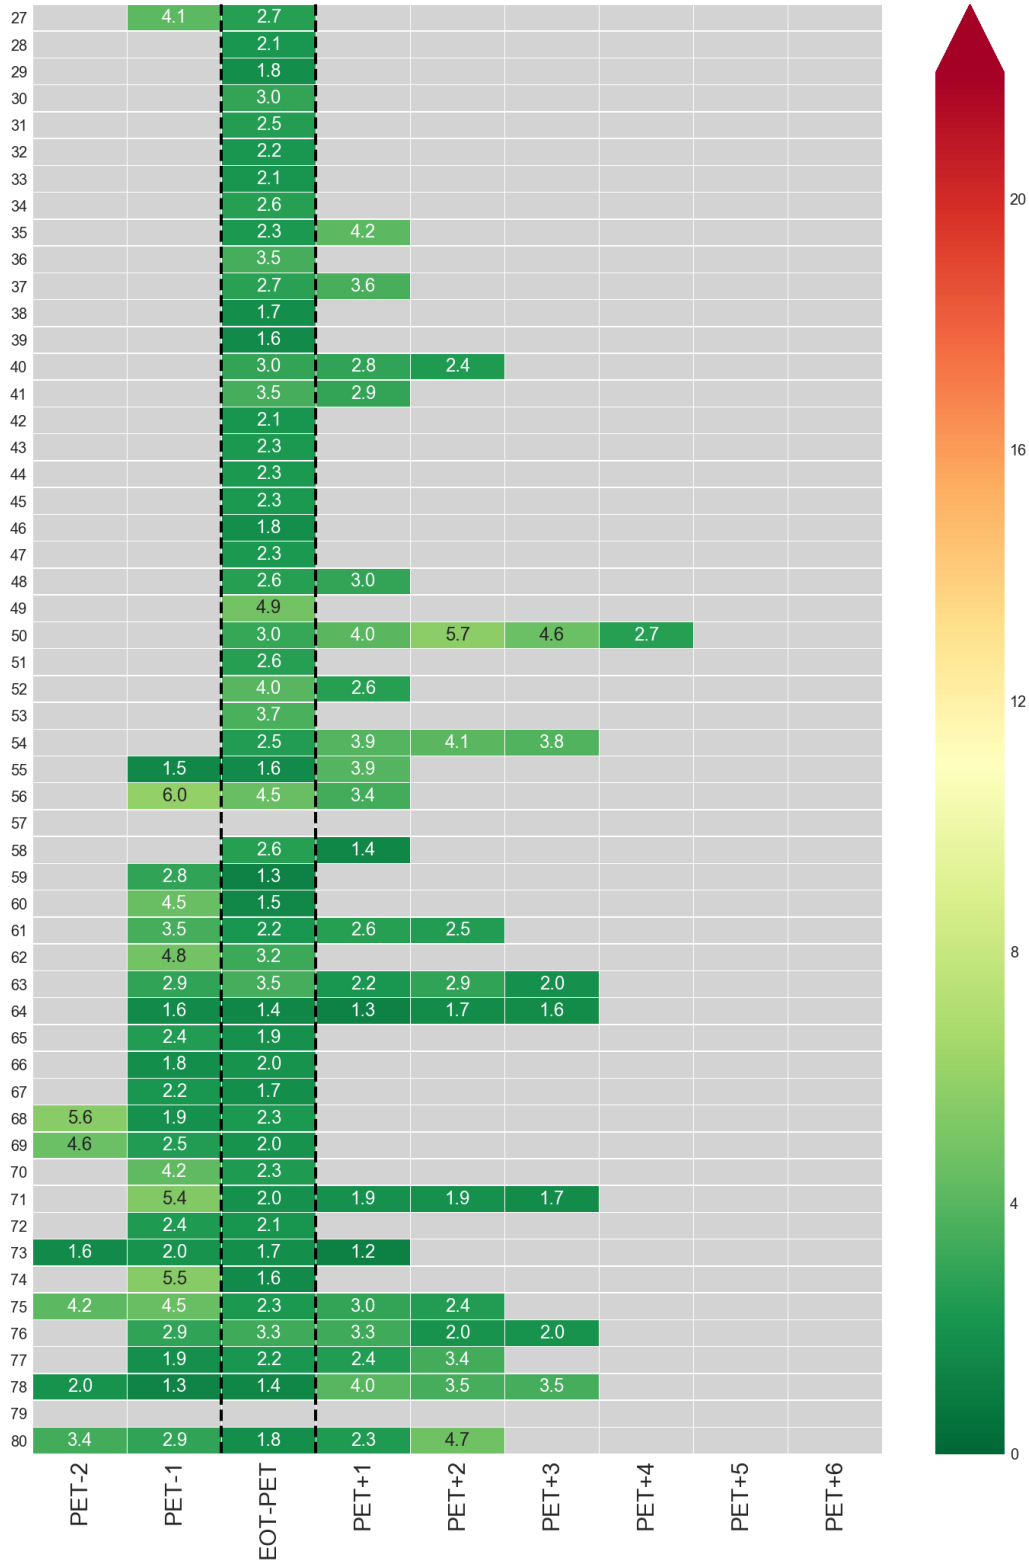

**Figure 1B.** Deauville score in negative EOT FDG-PET non-progressors.

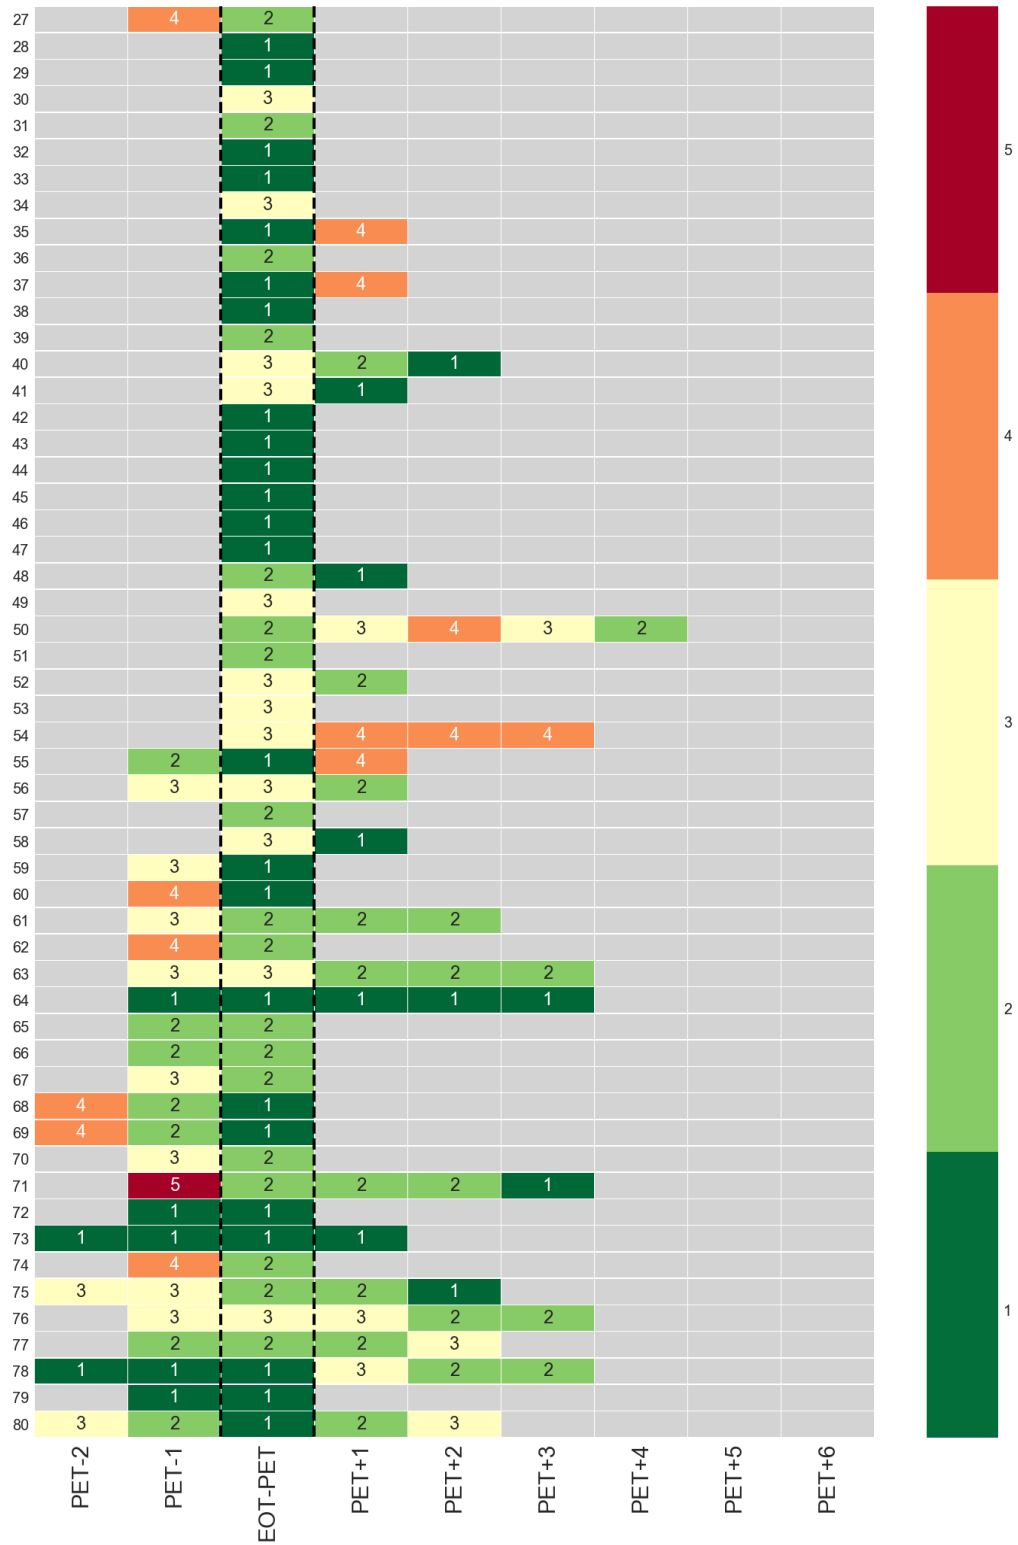

**Figure 2A.** Metabolic tumor volume in NCI patients with treatment failure.

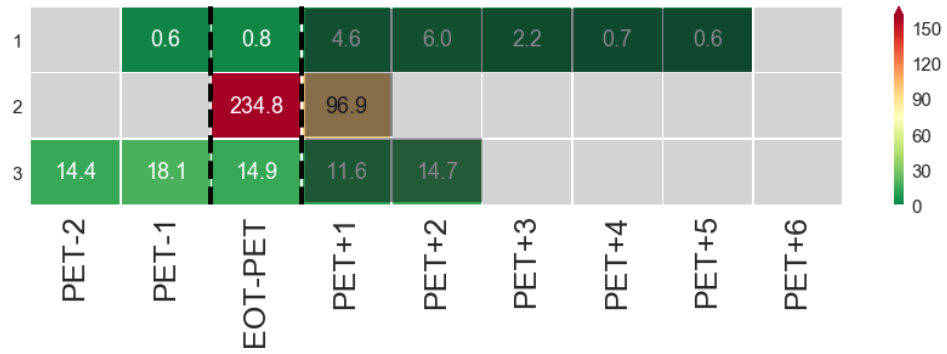

**Figure 2B.** Metabolic tumor volume in positive EOT FDG-PET non-progressing NCI patients.

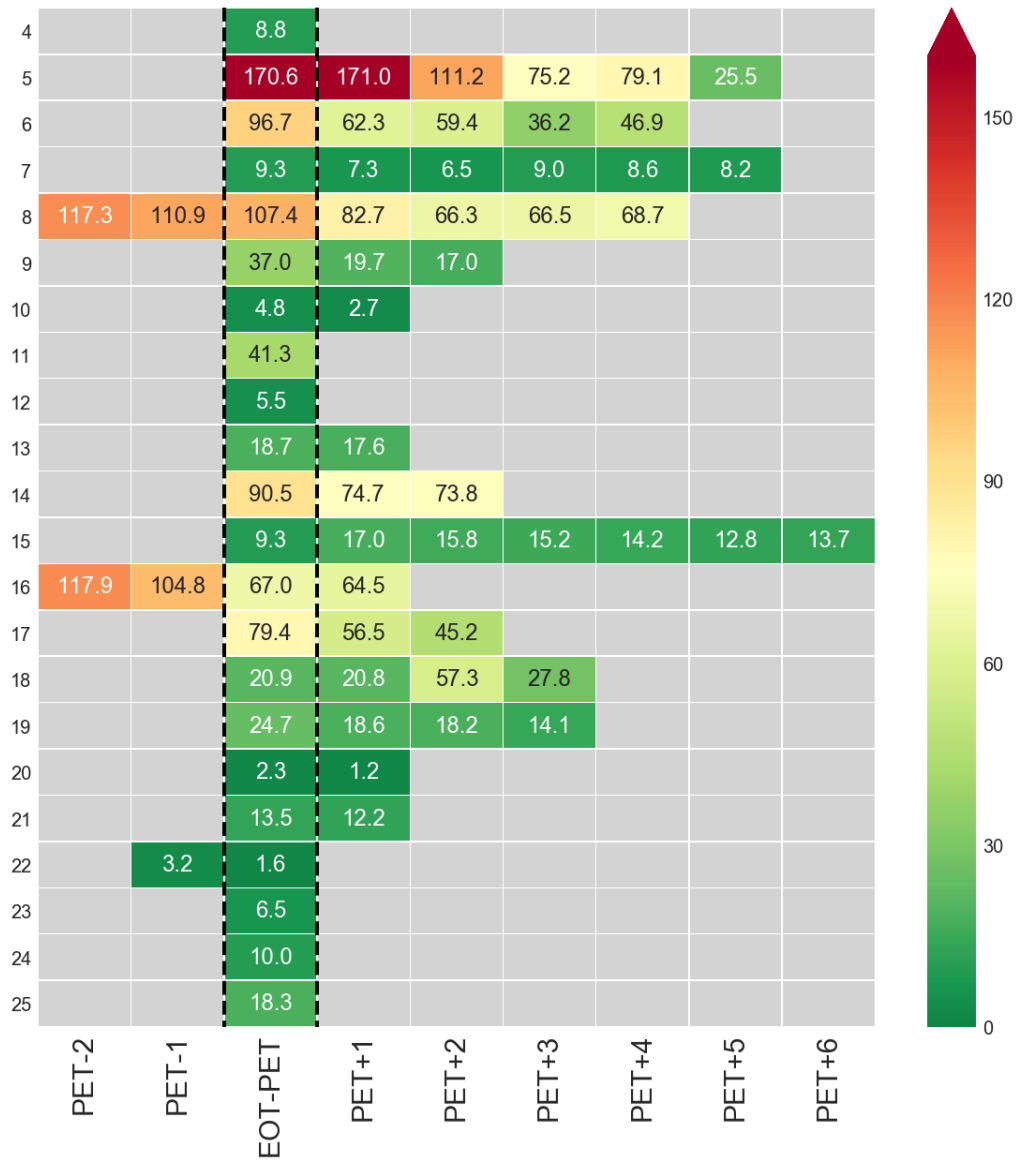

**Figure 2C.** Metabolic tumor volume in negative EOT FDG-PET non-progressing NCI patients.

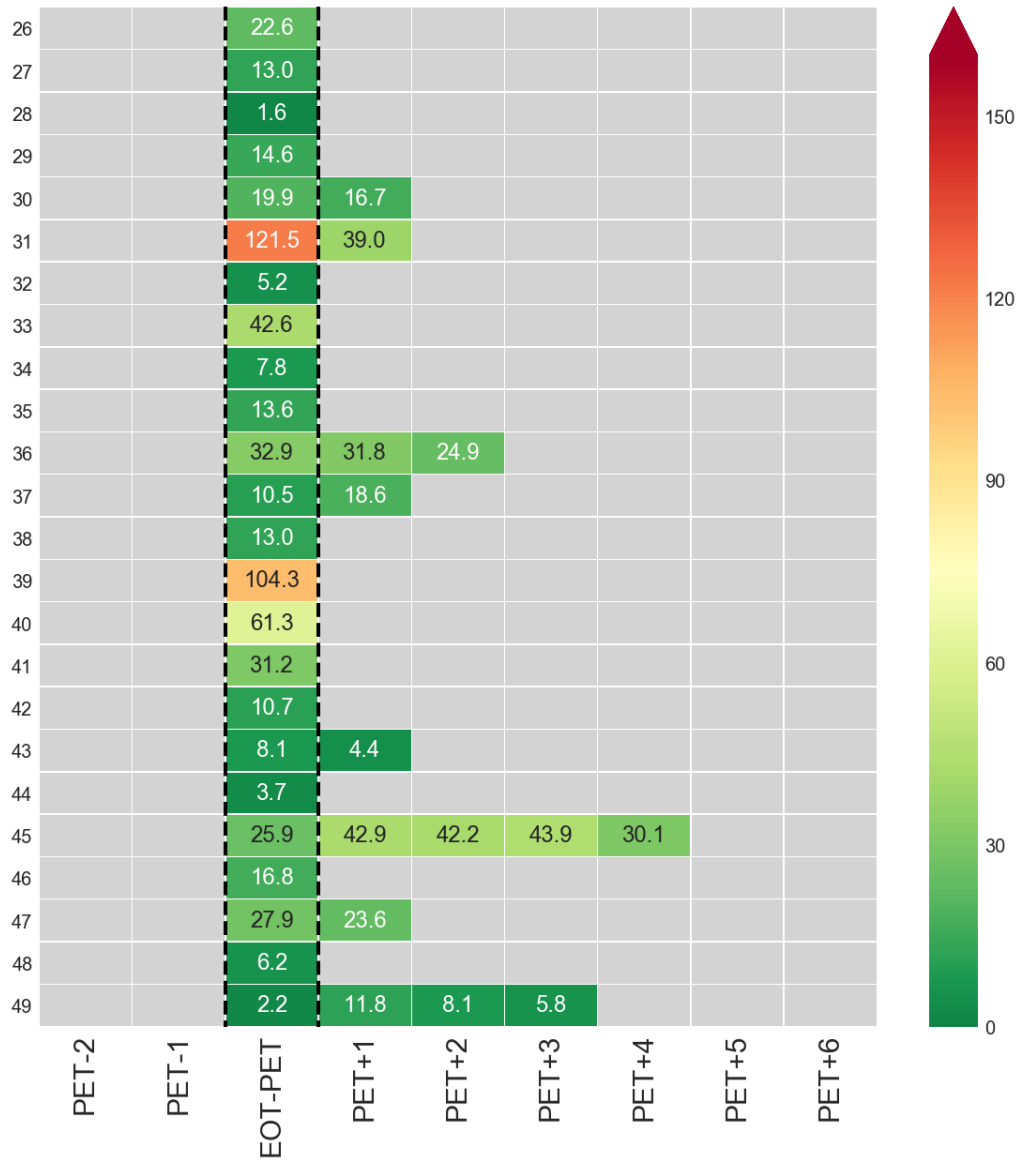

**Figure 3A.** Total lesion glycolysis in NCI patients with treatment failure.

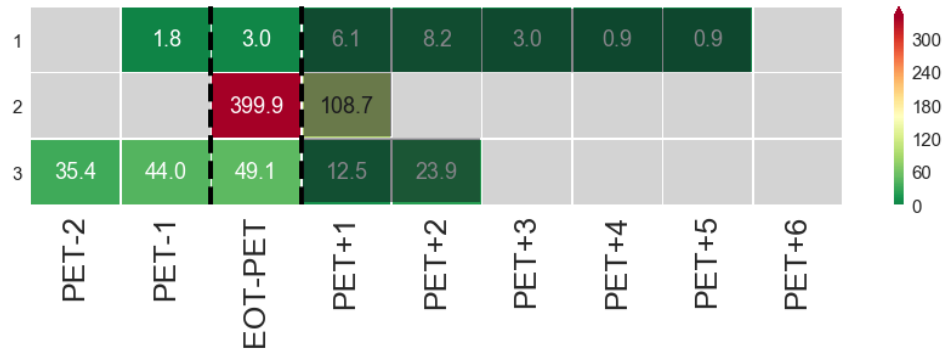

**Figure 3B.** Total lesion glycolysis in positive EOT FDG-PET non-progressing NCI patients.

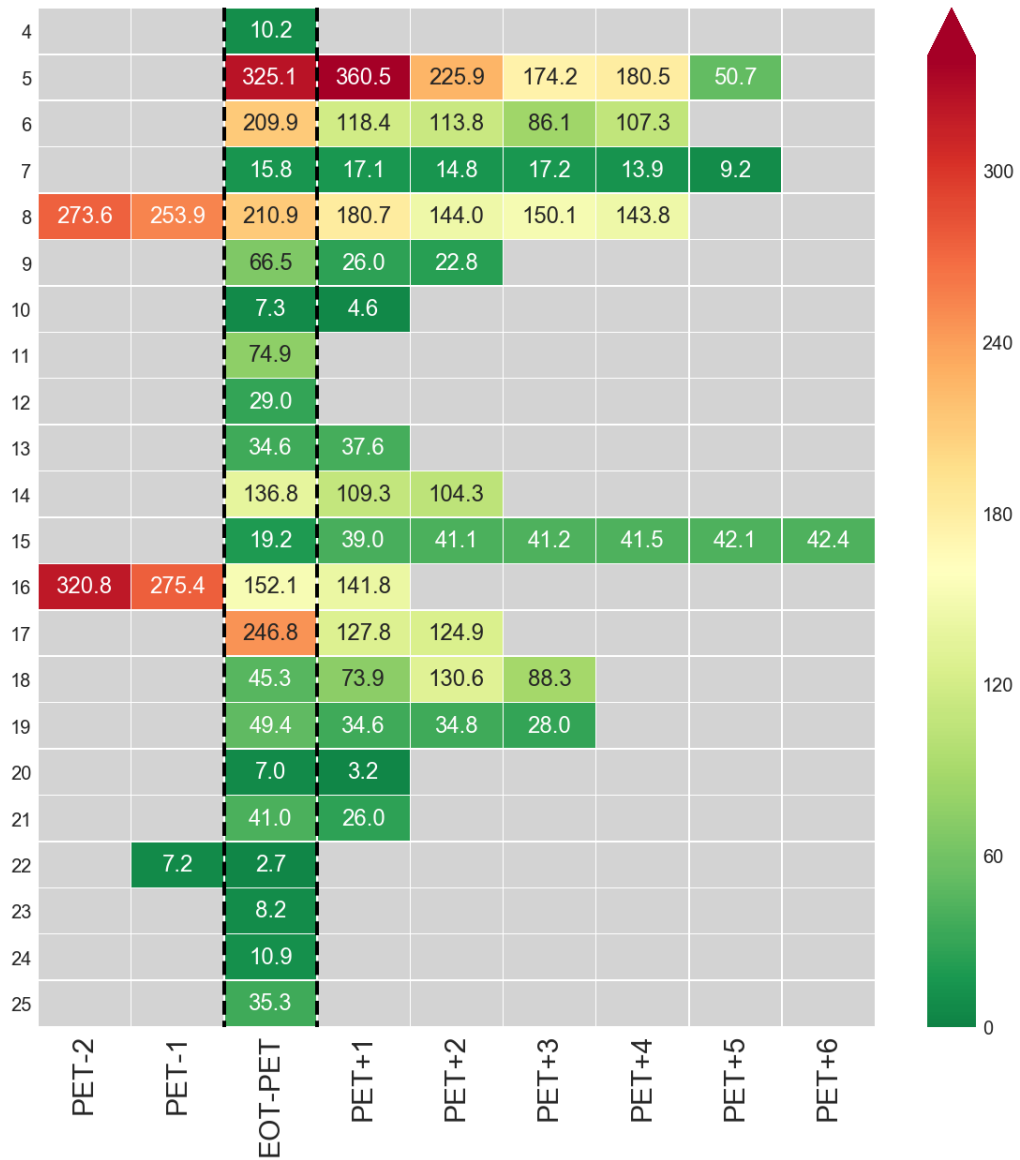

**Figure 3C.** Total lesion glycolysis in negative EOT FDG-PET non-progressing NCI patients.

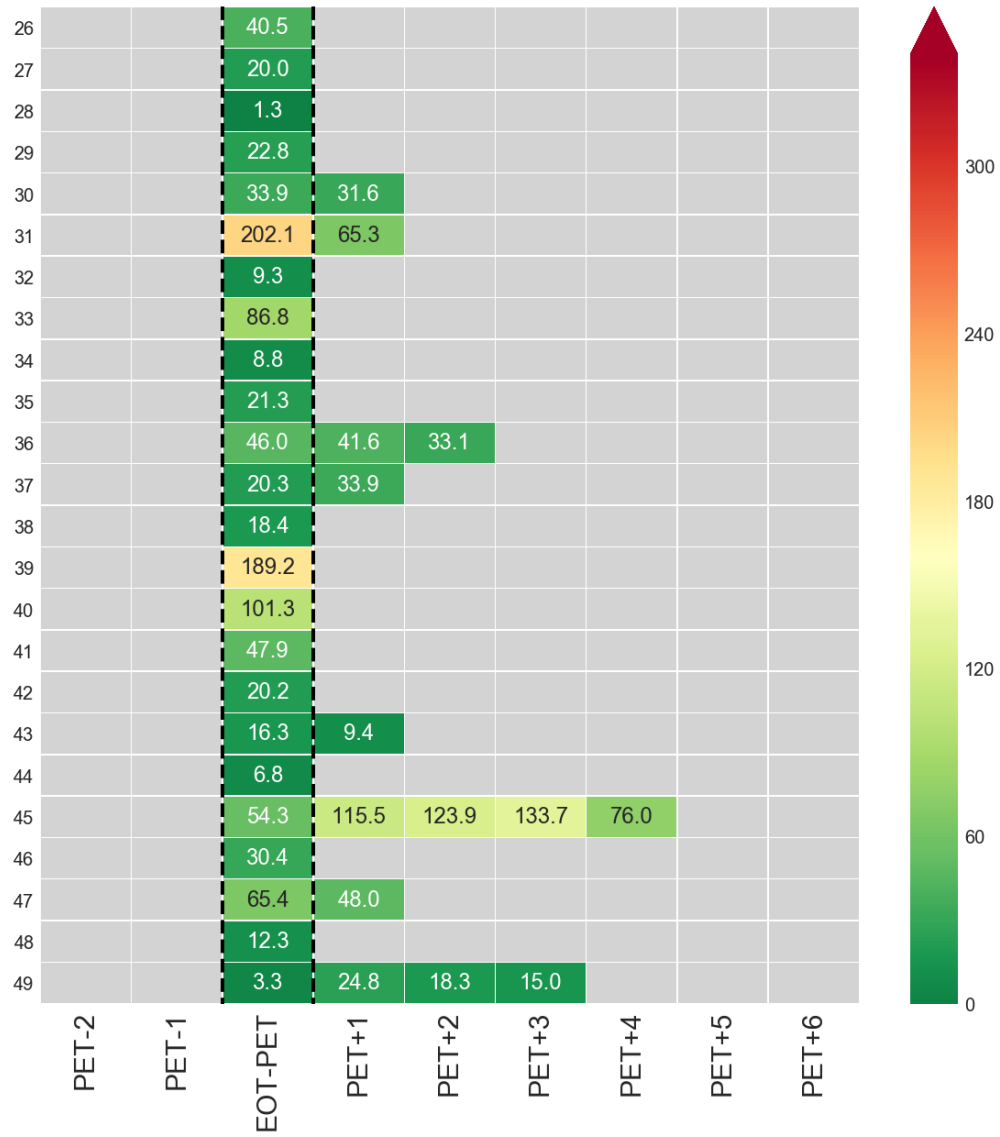

## **SUPPLEMENTARY FIGURE LEGENDS**

### **Figure 1. Serial FDG-PET imaging in negative EOT FDG-PET non-progressors.**

Heatmap depiction of (A).  $SUV_{max}$  and (B). Deauville score, over time in the 56 non-progressing patients with a negative EOT FDG-PET scan. FDG-PET scans performed prior to the EOT FDG-PET are listed as negative numbers with those following the EOT FDG-PET listed as positive numbers. The EOT FDG-PET scan is bordered by black dashed lines. Two patients (#57 and #79) did not have EOT  $SUV_{max}$  values despite having an EOT Deauville score due to technical reasons.

### **Figure 2. Metabolic tumor volume (MTV) in NCI patients.**

Heatmap depiction of MTV in the 49 NCI patients with an EOT FDG-PET scan and serial FDG-PET imaging. The significant variability in MTV values between (A). treatment failures, (B). positive EOT FDG-PET non-progressors, and (C). negative EOT FDG-PET non-progressors, is likely secondary to the overall low volume of disease following therapy in these patients as well as the inability to exclude non-malignant causes of FDG uptake (i.e. thymic rebound, normal variant brown fat, infectious/inflammatory causes, etc.) during contouring and calculation. FDG-PET scans performed prior to the EOT FDG-PET are listed as negative numbers with those following the EOT FDG-PET listed as positive numbers. The EOT FDG-PET scan is bordered by black dashed lines. FDG-PET scans performed following salvage intervention are shaded in black.



**Figure 3. Total lesion glycolysis (TLG) in NCI patients.**

Heatmap depiction of TLG in the 49 NCI patients with an EOT FDG-PET scan and serial FDG-PET imaging. The significant variability in TLG values between (A). treatment failures, (B). positive EOT FDG-PET non-progressors, and (C). negative EOT FDG-PET non-progressors, is likely secondary to the overall low volume of disease following therapy in these patients as well as the inability to exclude non-malignant causes of FDG uptake (i.e. thymic rebound, normal variant brown fat, infectious/inflammatory causes, etc.) during contouring and calculation. FDG-PET scans performed prior to the EOT FDG-PET are listed as negative numbers with those following the EOT FDG-PET listed as positive numbers. The EOT FDG-PET scan is bordered by black dashed lines. FDG-PET scans performed following salvage intervention are shaded in black.
